# Supplementary material for: Preparation and performance study of rhodamine B naphthylamide, a fluorescent probe, for the detection of Fe3+
Source: Royal Society of Chemistry journal article supplement (doi:10.1039/d3ay01809a), 2023-01-01
Supplement: d3ay01809a1.pdf [file d3ay01809a1.pdf]

## Supporting information

### **Preparation and performance study of a fluorescent probe of rhodamine B naphthylamide for the detection of Fe<sup>3+</sup>**

Jialin Wang, Shenghua Lv \*, Jingjing Zuo, Shan Liang, Juhui Yang, Leipeng Liu  
Dequan Wei, \*

College of Bioresources Chemical and Materials Engineering, Shaanxi University of Science and Technology,

Xi'an 710021, China;

\* Correspondence: Weidquan@hotmail.com (D.W.); lvsh@sust.edu.cn (S.L.); Tel.: +86-298-616-8291 (X.L.)

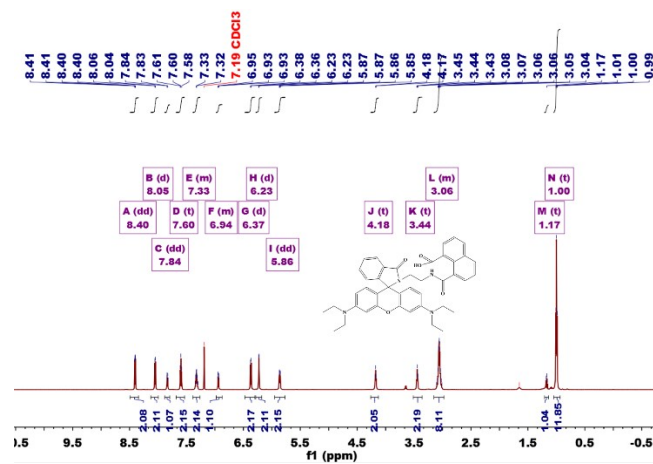

Figure S1. NMR  $^1\text{H}$  spectra of the fluorescent probe NA-RhBEA.

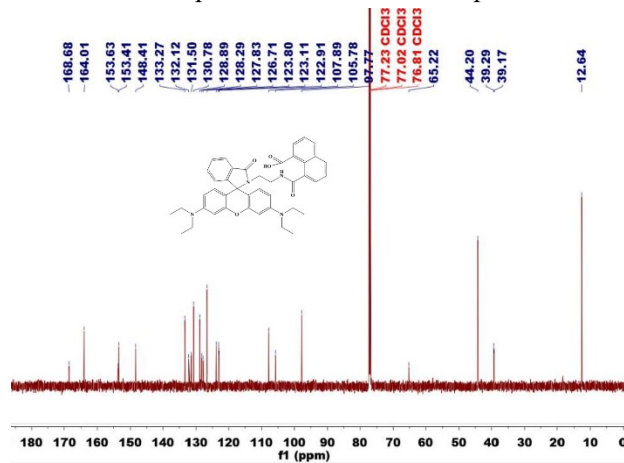

Figure S2. NMR  $^{13}\text{C}$  spectra of the fluorescent probe NA-RhBEA.

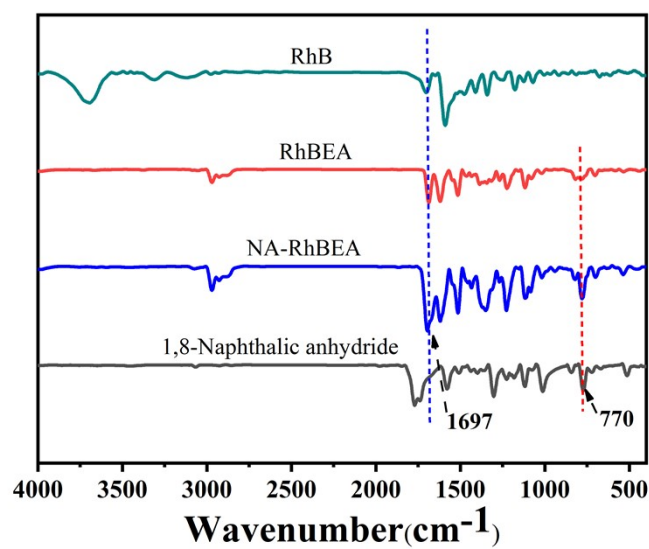

Figure S3. FT-IR spectra of RhB, RhBEA, 1,8-NA and NA-RhBEA;

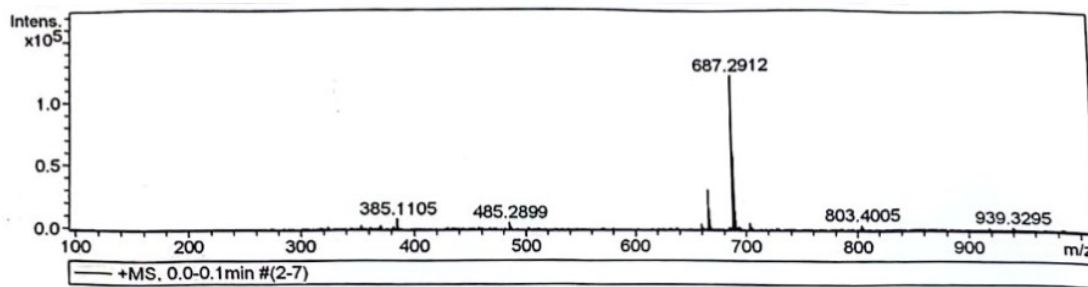

Figure S4. Mass spectra of NA-RhBEA.

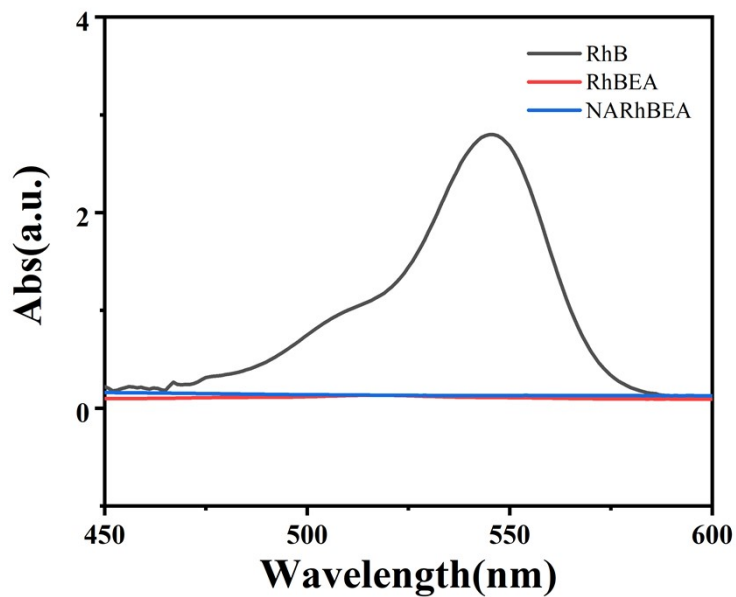

Figure S5. UV-Vis absorption spectra of RhB, RhBEA and NA-RhBEA.

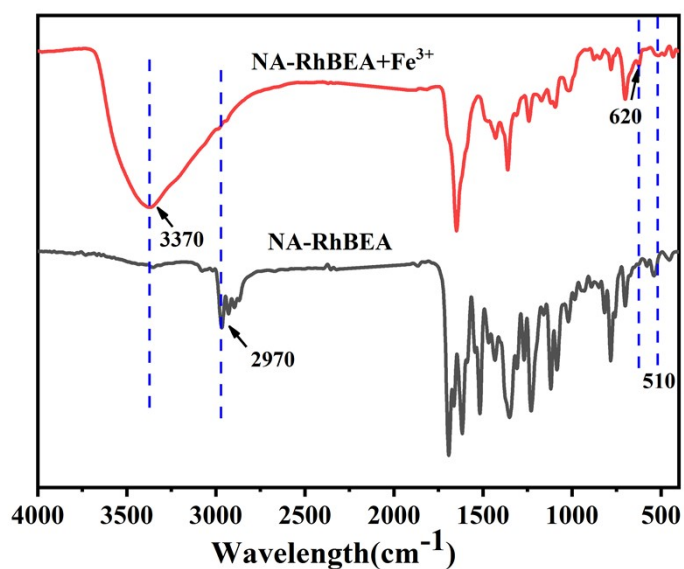

Figure S6. Group changes of NA-RhBEA before and after complexation with  $\text{Fe}^{3+}$ .
